# Supplementary material for: Controlled degradation of polycaprolactone-based micropillar arrays
Source: Royal Society of Chemistry journal article supplement (doi:10.1039/d3bm00165b), 2023-01-01
Supplement: d3bm00165b1.pdf [file d3bm00165b1.pdf]

## Controlled Degradation of Polycaprolactone-based Micropillar Arrays

*Niamh Geoghegan,<sup>1,2^</sup> Mark O'Loughlin,<sup>1^</sup> Colm Delaney,<sup>3</sup> Keith D. Rochfort,<sup>4</sup> Meabh Kennedy,<sup>5</sup> Srikanth Kolagatla,<sup>3,6</sup> Lucia Podhorska,<sup>1</sup> Brian J. Rodriguez,<sup>6</sup> Larisa Florea,<sup>3</sup> and Susan M. Kelleher<sup>1,2,5</sup>*

### Supplementary Information

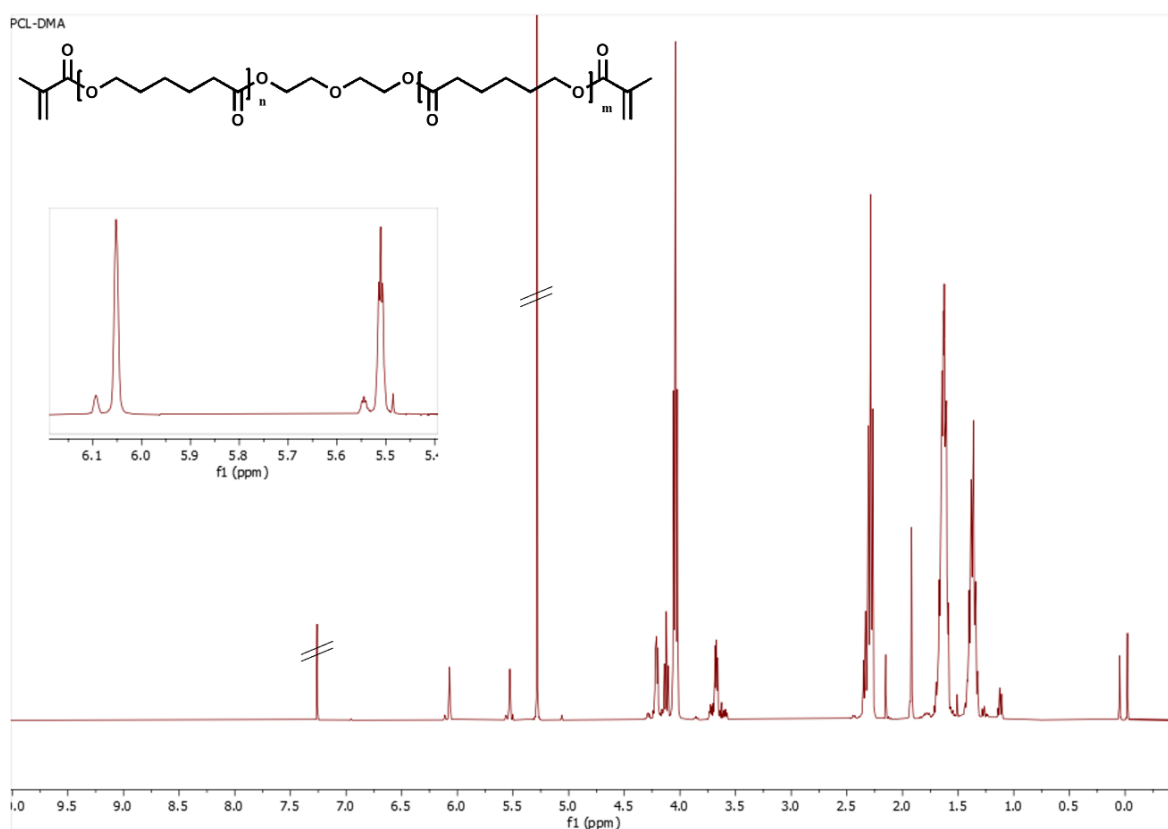

**Figure S1:** <sup>1</sup>H NMR spectra of PCLDMA

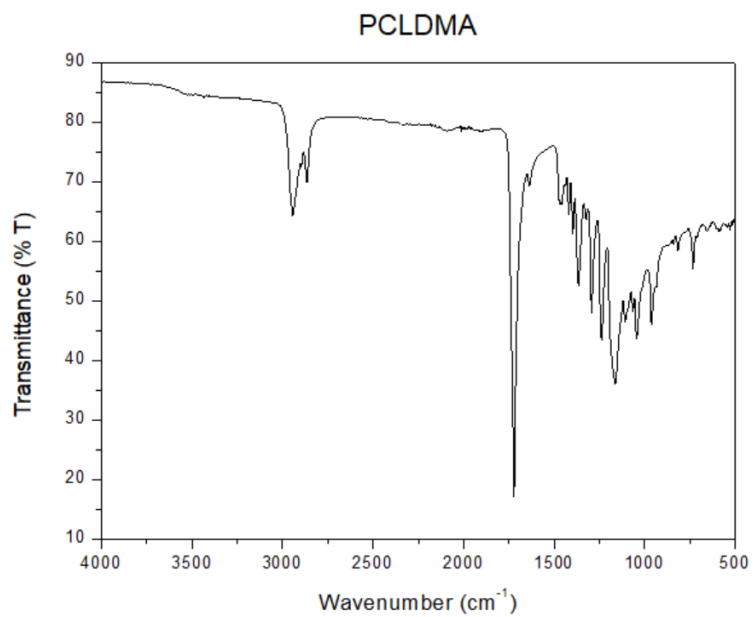

**Figure S2:** FTIR spectra of PCLDMA

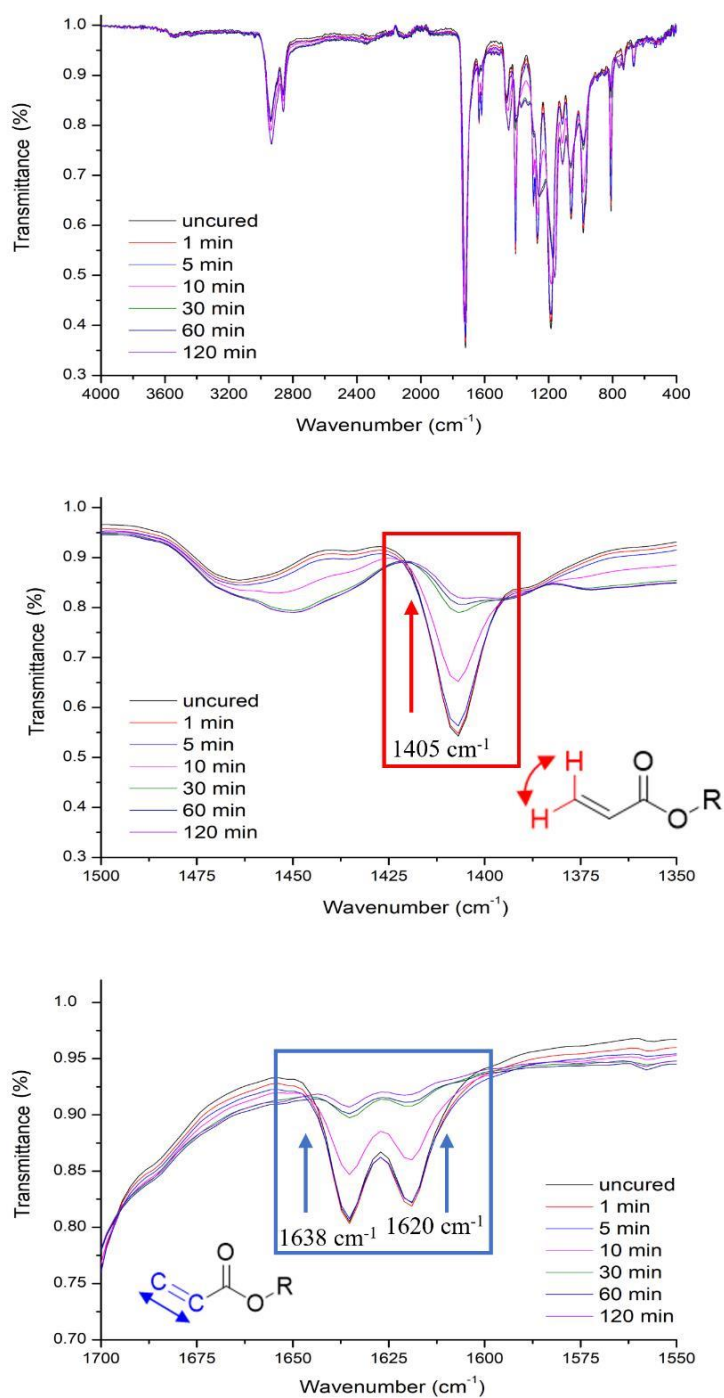

**Figure S3:** FTIR spectra of neat HDDA (1 % PBPO w/w) photopolymerised using the white light irradiation source at different time points from 0 - 120 mins. Top: The full spectra of the timepoints are shown. Middle: A close up of the peaks centred at  $1410\text{ cm}^{-1}$  related to the vibration of terminal allyl  $\text{-CH}$  groups. Bottom:  $1620\text{ cm}^{-1}$  and  $1638\text{ cm}^{-1}$  describe the stretching of the  $\text{C=C}$  bonds of acrylate groups.

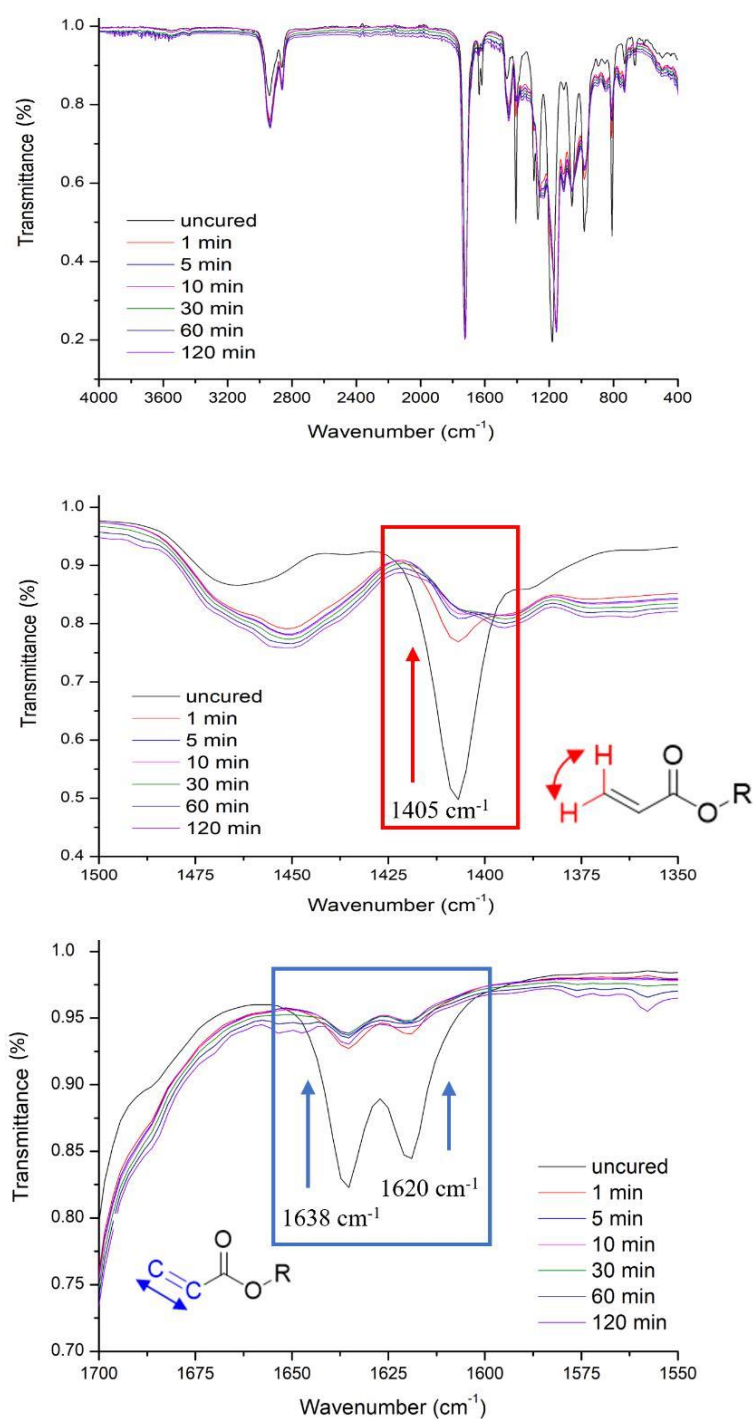

**Figure S4:** FTIR spectra of 1:9 PCLDMA:HDDA (1 % PBPO w/w) photopolymerised using the white light irradiation source at different time points from 0 - 120 mins. Top: The full spectra of the timepoints are shown. Middle: A close up of the peaks centred at  $1410 \text{ cm}^{-1}$  related to the vibration of terminal allyl  $-\text{CH}$  groups. Bottom:  $1620 \text{ cm}^{-1}$  and  $1638 \text{ cm}^{-1}$  describe the stretching of the  $\text{C}=\text{C}$  bonds of acrylate groups.

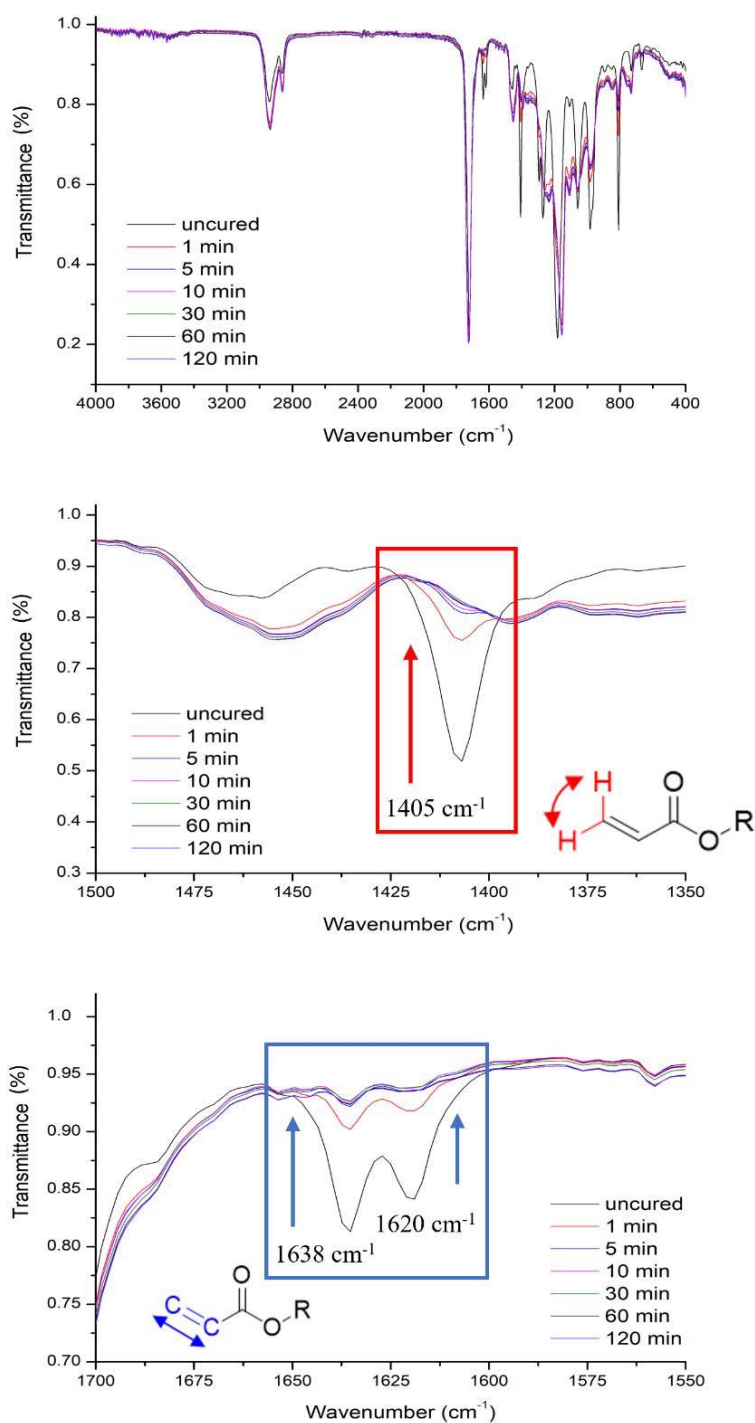

**Figure S5:** FTIR spectra of 1:4 PCLDMA:HDDA (1 % PBPO w/w) photopolymerised using the white light irradiation source at different time points from 0 - 120 mins. Top: The full spectra of the timepoints are shown. Middle: A close up of the peaks centred at  $1410\text{ cm}^{-1}$  related to the vibration of terminal allyl  $-\text{CH}$  groups. Bottom:  $1620\text{ cm}^{-1}$  and  $1638\text{ cm}^{-1}$  describe the stretching of the  $\text{C}=\text{C}$  bonds of acrylate groups.

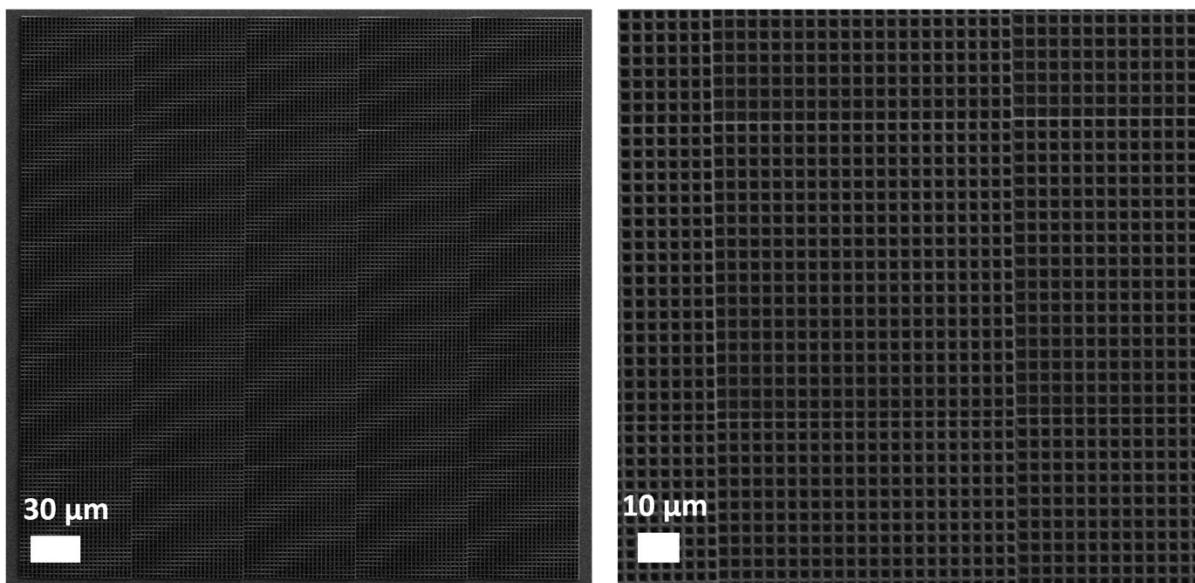

**Figure S6:** SEM images of multiple two-photon polymerised templates ‘stitched’ together to form a large  $390 \times 390 \mu\text{m}$  template.

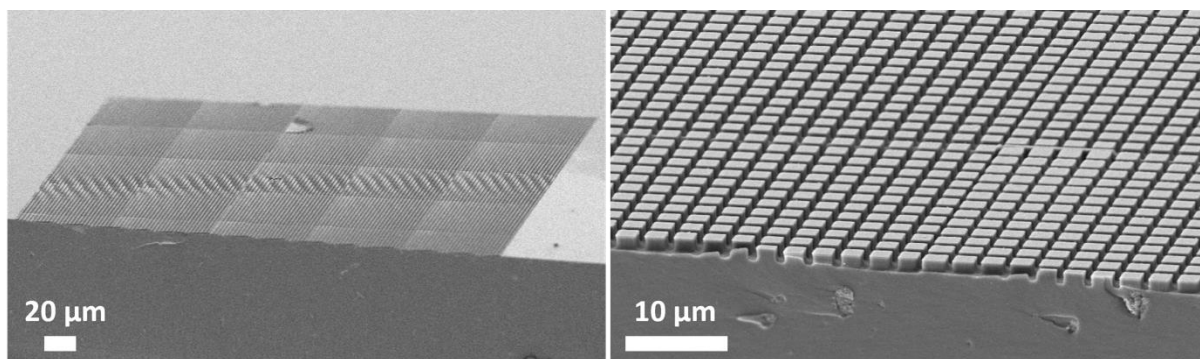

**Figure S7:** SEM images of large arrays of pillars replicated using **10%PH** from the large  $390 \times 390 \mu\text{m}$  template *via* NIL.

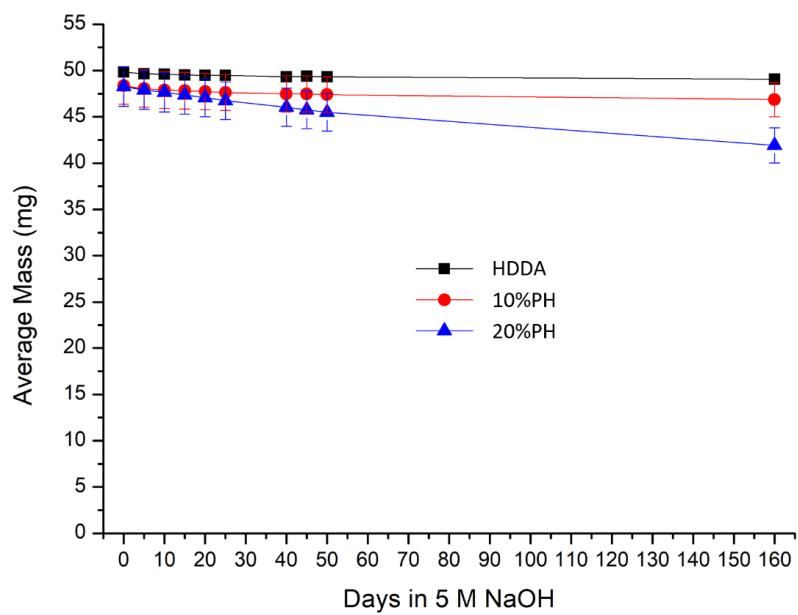

**Figure S8:** Average mass vs days in 5 M NaOH of bulk samples of HDDA control (black), **10%PH** (red), and **20%PH** (blue).

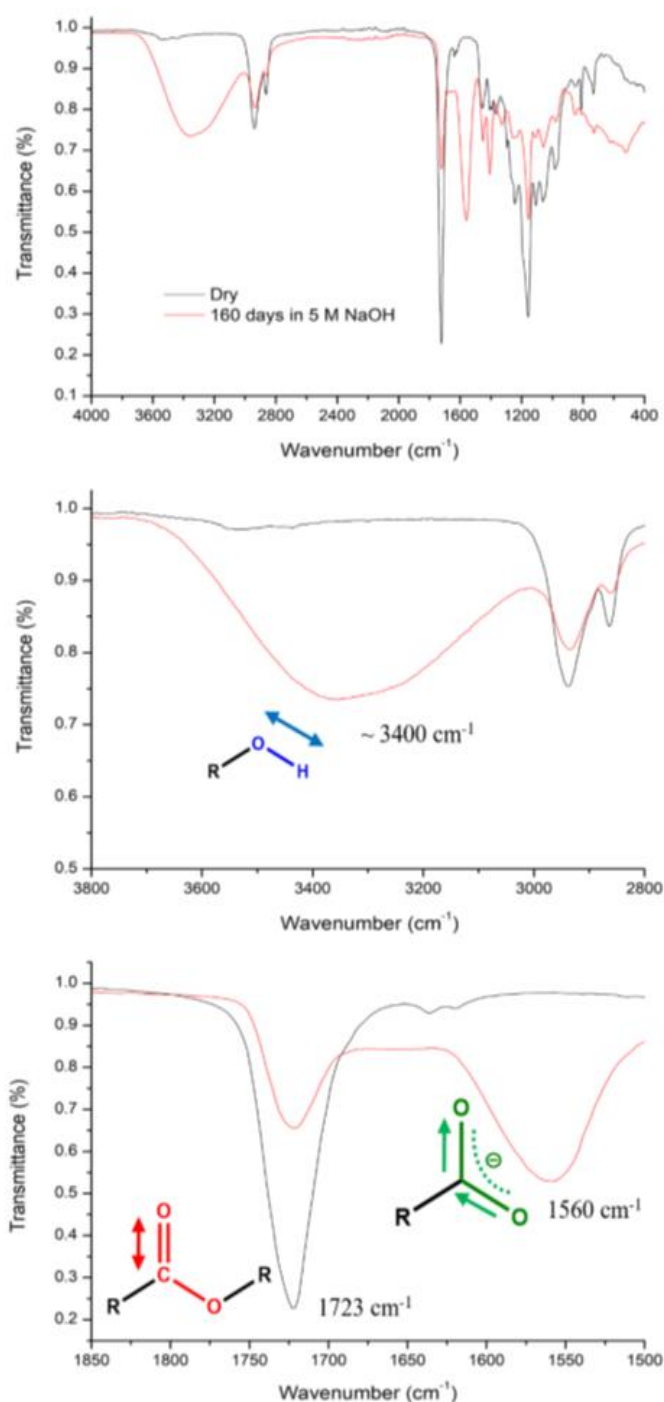

**Figure S9:** FTIR spectra of **20%PH** containing 1 % w/w PBPO before degradation in 5 M NaOH (dry) and after degradation for 160 days in 5 M NaOH. The full spectra are shown (top) as well as a close up of the regions peaks centred at  $3400\text{ cm}^{-1}$  which described the stretching of the OH bonds (middle) and  $1723\text{ cm}^{-1}$  and  $1560\text{ cm}^{-1}$  related to the stretching of C=O bonds and carboxylate anions, respectively (bottom).



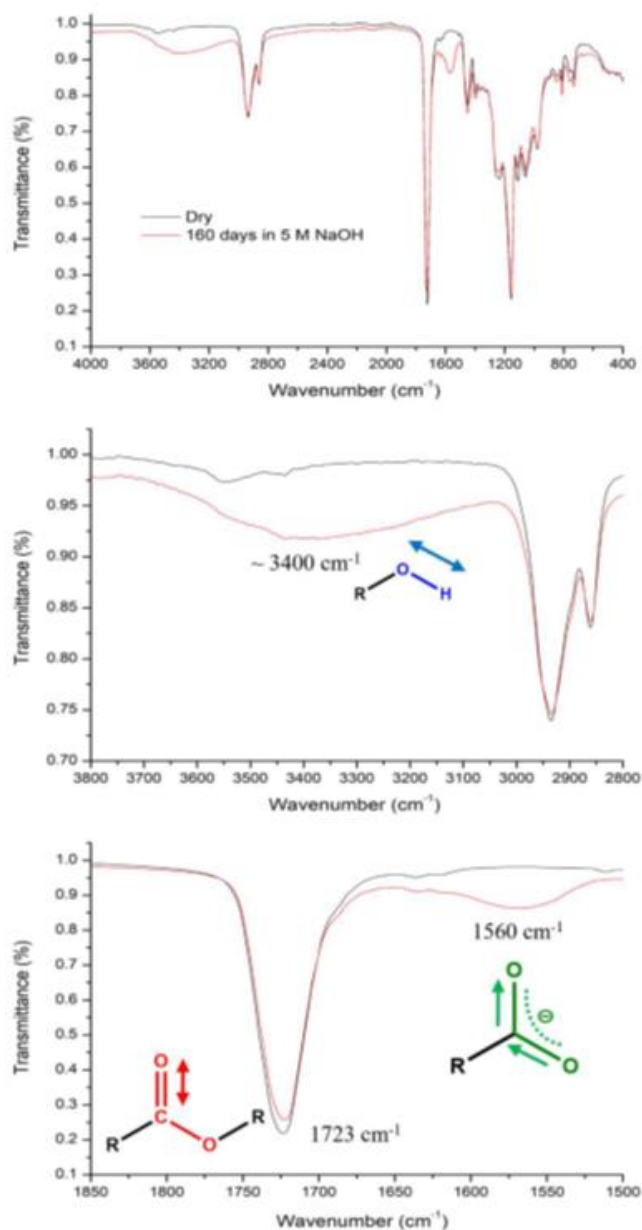

**Figure S10:** FTIR spectra of **10%PH** containing 1 % w/w PBPO before degradation in 5 M NaOH (dry) and after degradation for 160 days in 5 M NaOH. The full spectrum is shown (top) as well as a close up of the regions peaks centred at  $3400\text{ cm}^{-1}$  which described the stretching of the OH bonds (middle) and  $1723\text{ cm}^{-1}$  and  $1560\text{ cm}^{-1}$  related to the stretching of C=O bonds and carboxylate anions, respectively (bottom).

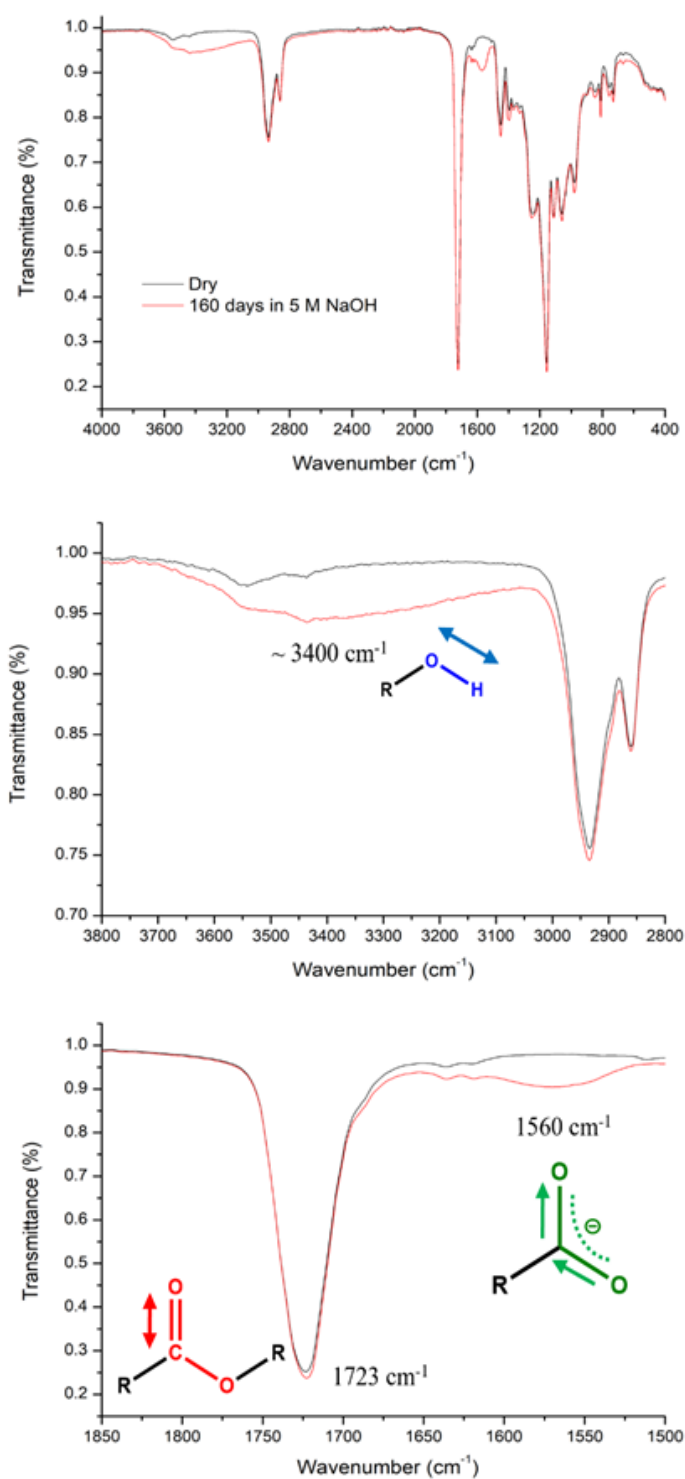

**Figure S11:** FTIR spectra of neat HDDA containing 1 % w/w PBPO before degradation in 5 M NaOH (dry) and after degradation for 160 days in 5 M NaOH. The full spectrum is shown (top) as well as a close up of the regions peaks centred at 3400 cm<sup>-1</sup> which described the stretching of the OH bonds (middle) and 1723 cm<sup>-1</sup> and 1560 cm<sup>-1</sup> related to the stretching of C=O bonds and carboxylate anions, respectively (bottom).

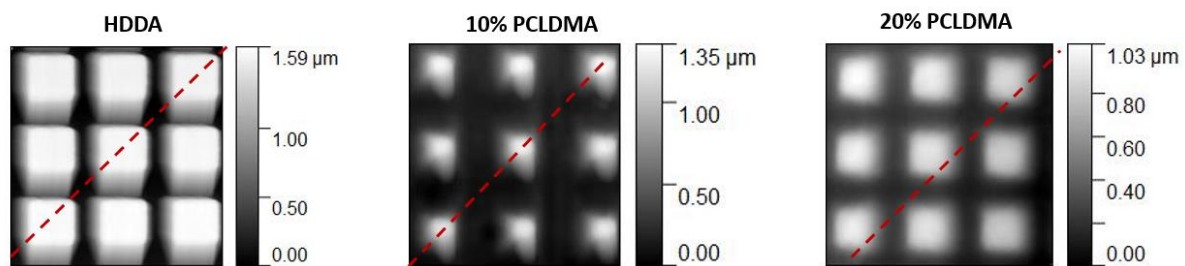

**Figure S12:** Atomic force height images of 2x2x2 μm samples, shows traces used to give height profiles in **Figure 5**. From left to right: HDDA, **10%PH** and **20%PH**, all after 5 days NaOH exposure.
